# Supplementary material for: Admixture and natural selection shaped genomes of an Austronesian-speaking population in the Solomon Islands
Source: PubMed Central journal article supplement (PMC7181741; doi:10.1038/s41598-020-62866-3), 2020-04-23
Supplement: 41598_2020_62866_MOESM1_ESM.pdf [file 41598_2020_62866_MOESM1_ESM.pdf]

**Supplemental Info** (seven figures and one table)

## **Admixture and natural selection shaped genomes of an Austronesian-speaking population in the Solomon Islands**

Mariko Isshiki,<sup>1</sup> Izumi Naka,<sup>1</sup> Yusuke Watanabe,<sup>1</sup> Nao Nishida,<sup>2</sup> Ryosuke Kimura,<sup>3</sup> Takuro Furusawa,<sup>4</sup> Kazumi Natsuhara,<sup>5</sup> Taro Yamauchi,<sup>6</sup> Minato Nakazawa,<sup>7</sup> Takafumi Ishida,<sup>1</sup> Ricky Eddie,<sup>8</sup> Ryutaro Ohtsuka,<sup>9</sup> Jun Ohashi<sup>1,\*</sup>

<sup>1</sup>Department of Biological Sciences, Graduate School of Science, The University of Tokyo, Tokyo 113-0033, Japan

<sup>2</sup>Genome Medical Science Project, Research Center for Hepatitis and Immunology, National Center for Global Health and Medicine, Chiba 272-8516, Japan

<sup>3</sup>Department of Human Biology and Anatomy, Graduate School of Medicine, University of the Ryukyus, Nishihara 903-0125, Japan

<sup>4</sup>Graduate School of Asian and African Area Studies, Kyoto University, Kyoto 606-8501, Japan

<sup>5</sup>Department of International Health and Nursing, Faculty of Nursing, Toho University, Tokyo 143-8540, Japan

<sup>6</sup>Faculty of Health Sciences, Hokkaido University, Sapporo 060-0812, Japan

<sup>7</sup>Graduate School of Health Sciences, Kobe University, Kobe 654-0142, Japan

<sup>8</sup>National Gizo Hospital, Ministry of Health and Medical Services, P.O. Box 36 , Gizo , Solomon Islands

<sup>9</sup>Japan Wildlife Research Center, Tokyo 130-8606, Japan

\*Correspondence: [juno-ky@umin.ac.jp](mailto:juno-ky@umin.ac.jp)

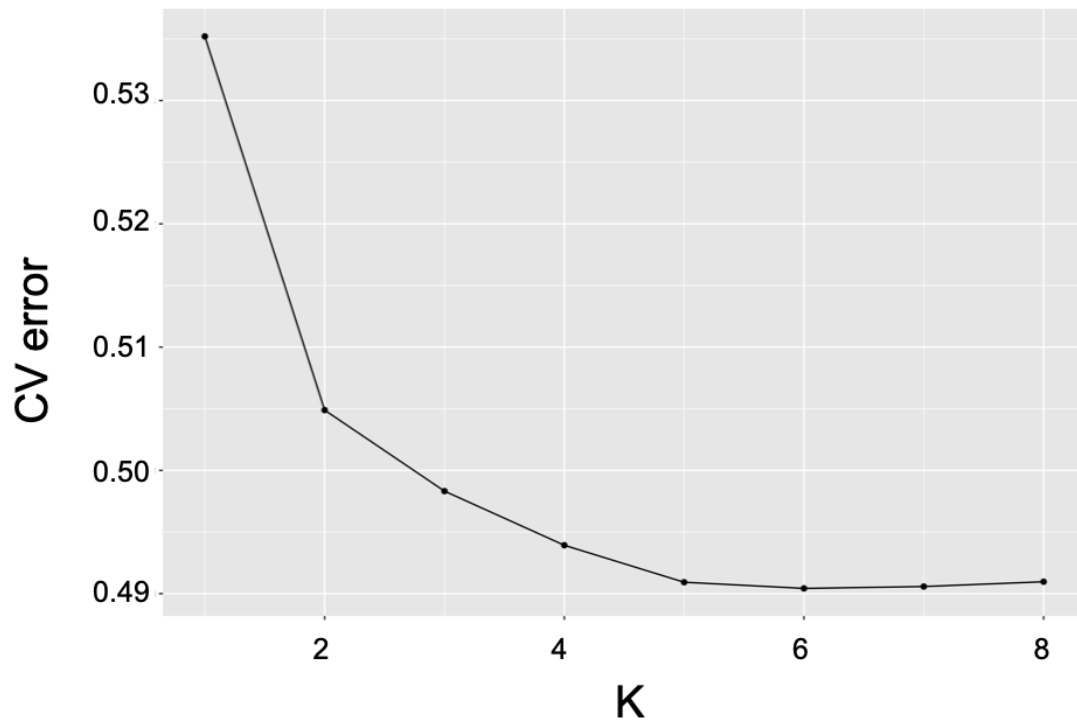

Figure S1. Estimated cross validation error for the ADMIXTURE analysis for the entire dataset (dataset 2).  
The result of  $K = 6$  is shown in Figure 2.

## ROLLOFF results

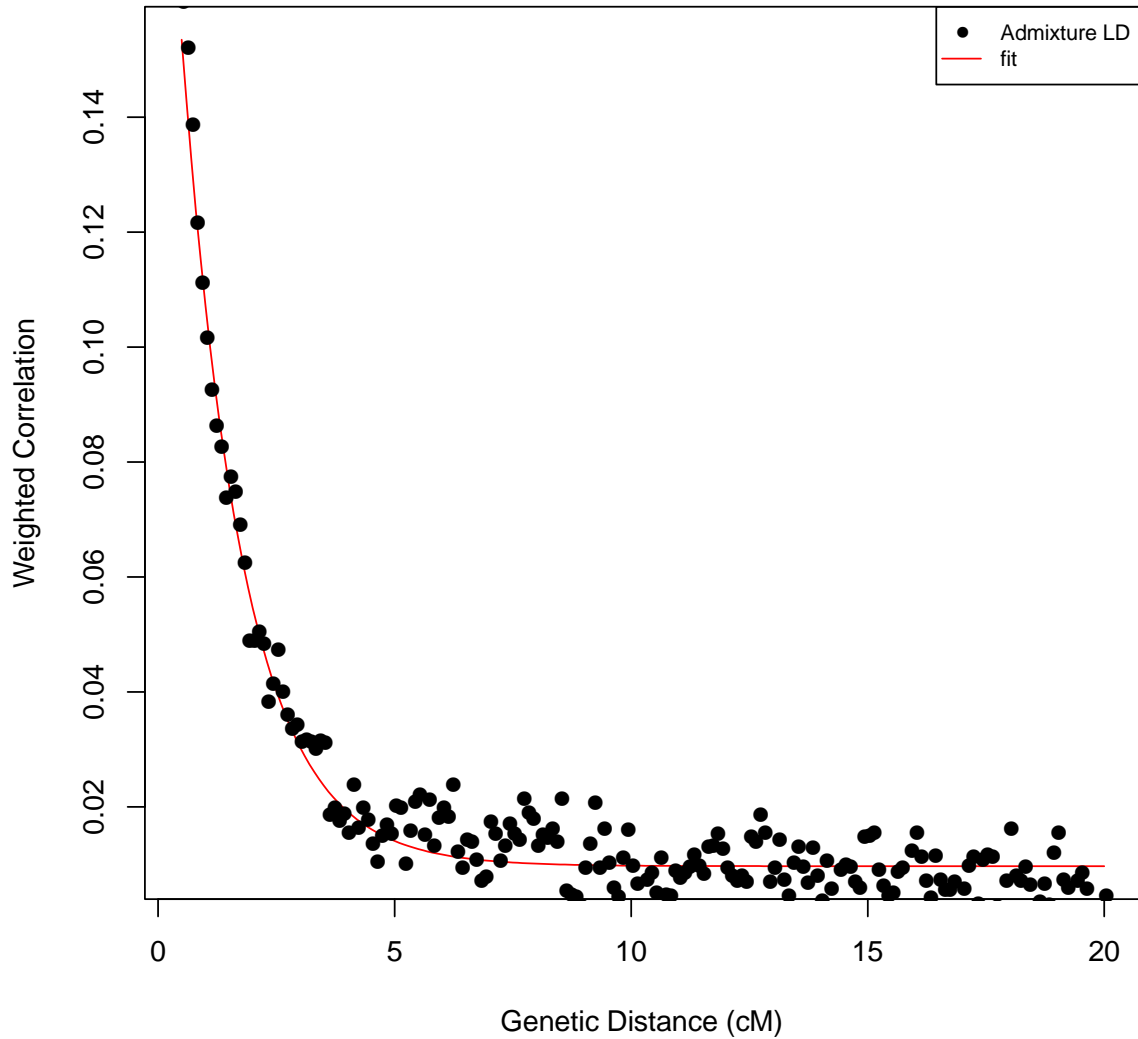

Figure S2. Decline of linkage disequilibrium.

The correlation between a statistic of linkage disequilibrium of a pair of markers and a weight which reflects their allele frequency differentiation in the ancestral populations was plotted as a function of genetic distance (cM). Admixture date was estimated by fitting an exponential distribution to this decline curve in ROLLOFF.

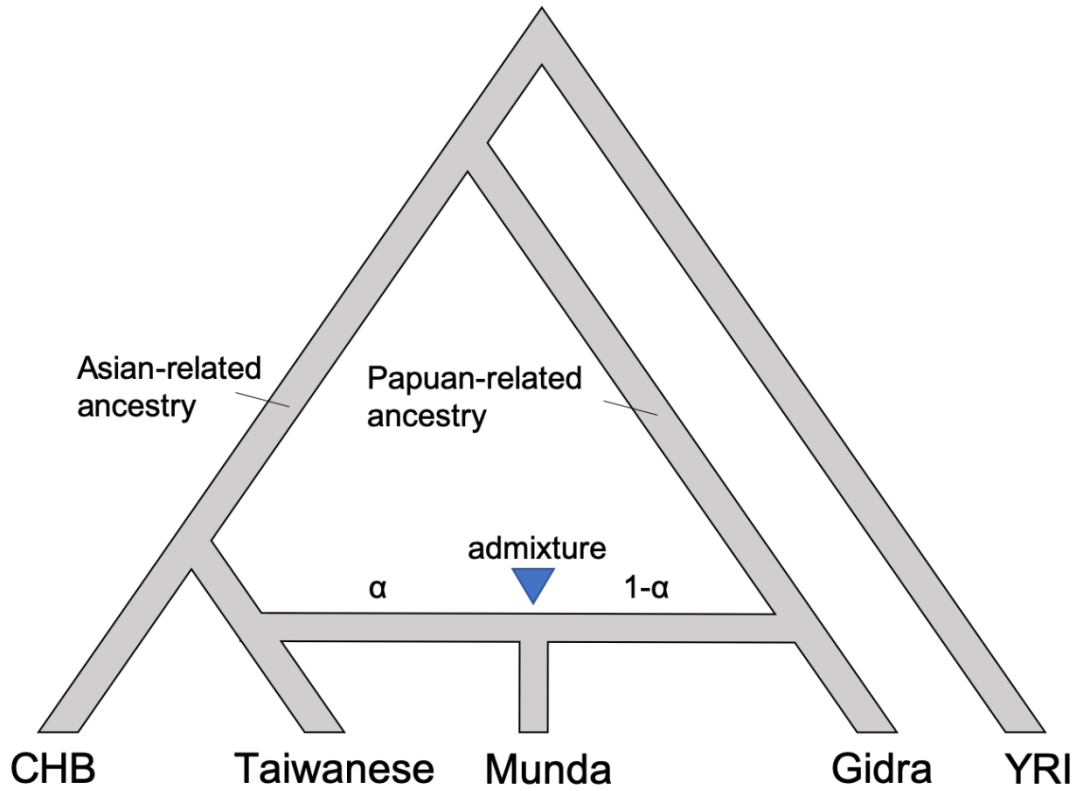

Figure S3. A phylogeny used for  $f_4$ -ratio estimation. CHB and Taiwanese are a clade and Gidra and YRI are increasingly distant outgroups in this phylogeny. The proportion of Asian-related ancestry in Munda was  $\alpha$ .

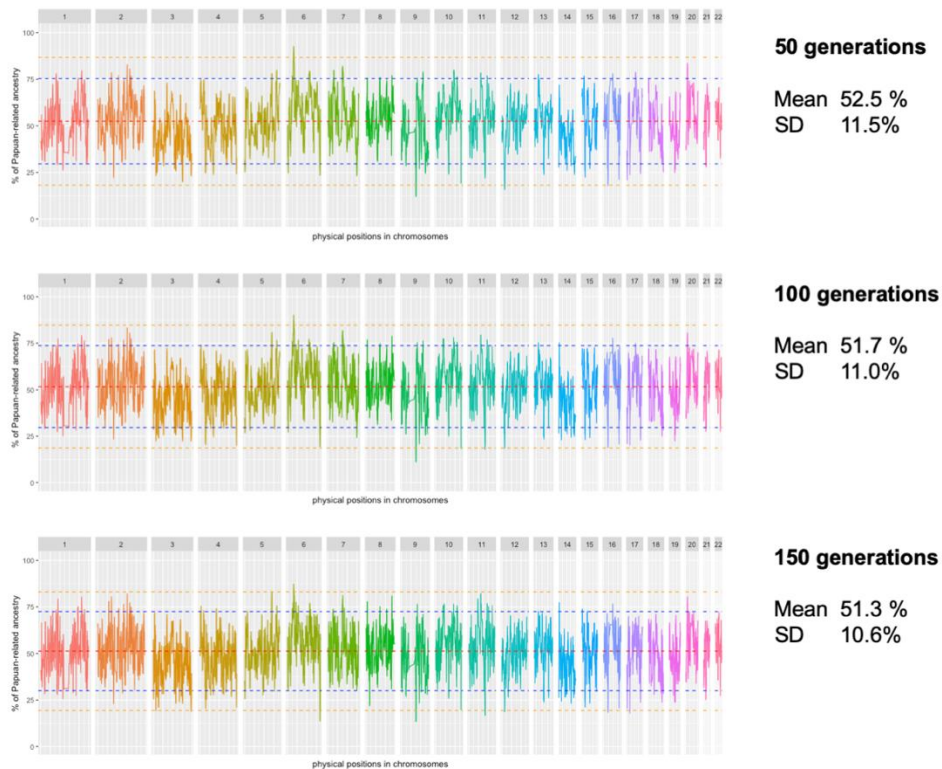

Figure S4. Average Papuan-related ancestry across Munda genomes estimated using ELAI assuming the date of admixture as 50, 100 and 150. Red dashed line represents the genome-wide mean. Blue and orange dashed lines represent  $\pm 2$  SD and  $\pm 3$  SD from the mean, respectively. The genome regions above the upper orange line and the lower orange line were regarded as the high Papuan- and Asian- related ancestry regions, respectively.

**a**

| Generations             | Mean-3sd(%) | Position                                             | Proportion of Papuan ancestry (%) | MIN_position                                         | Representative Genes                                                                                                                                                                                                      |
|-------------------------|-------------|------------------------------------------------------|-----------------------------------|------------------------------------------------------|---------------------------------------------------------------------------------------------------------------------------------------------------------------------------------------------------------------------------|
| 50                      | 18.13       | chr9:74635710-76433950                               | 12.01-18.01                       | chr9:75695677                                        | <i>C9orf57</i> , <i>GDA</i> , <i>5S_rRNA</i> , <i>AK095210</i> , <i>ZFAND5</i> , <i>TMC1</i> , <b><i>ALDH1A1</i></b> , <b><i>ANXA1</i></b>                                                                                |
|                         |             | chr12:14948762-16273615                              | 15.76-18.12                       | chr12:15370878                                       | <i>WBP11</i> , <i>C12orf60</i> , <i>SMCO3</i> , <i>ART4</i> , <i>MGP</i> , <i>C12orf60</i> , <i>ERP27</i> , <i>ARHGDI1B</i> , <i>PDE6H</i> , <b><i>RERG</i></b> , <i>PTPRO</i> , <i>EPS8</i> , <i>STRAP</i> , <i>DERA</i> |
|                         |             | chr16:23050015-23324026                              | 17.86-17.96                       | chr16:23050015,<br>chr16:23050120,<br>chr16:23050867 | <b><i>USP31</i></b> , <i>SCNN1G</i> , <i>SCNN1B</i>                                                                                                                                                                       |
| 77                      | 17.39       | chr6:168506547-169034278                             | 15.31-17.26                       | chr6:168978201,<br>chr6:168980936                    | <i>DACT2</i> , <b><i>SMOC2</i></b>                                                                                                                                                                                        |
|                         |             | chr9:74835176-76273853                               | 13.96-17.39                       | chr9:75695677,<br>chr9:75705507                      | <i>GDA</i> , <i>5S_rRNA</i> , <i>AK095210</i> , <i>ZFAND5</i> , <i>TMC1</i> , <b><i>ALDH1A1</i></b> , <b><i>ANXA1</i></b>                                                                                                 |
|                         |             | chr11:84112590-84386276                              | 16.35-17.36                       | chr11:84370674,<br>chr11:84371133                    | <b><i>DLG2</i></b>                                                                                                                                                                                                        |
| 100                     | 18.59       | chr9:74659028-76433395                               | 11.06-18.41                       | chr9:75810393                                        | <i>C9orf57</i> , <i>GDA</i> , <i>5S_rRNA</i> , <i>AK095210</i> , <i>ZFAND5</i> , <i>TMC1</i> , <b><i>ALDH1A1</i></b> , <b><i>ANXA1</i></b>                                                                                |
|                         |             | chr10:131086824-131427717                            | 18.33-18.59                       | chr10:131146611                                      | <b><i>MGMT</i></b>                                                                                                                                                                                                        |
|                         |             | chr11:84222437-84380621                              | 17.9-18.30                        | chr11:84371133                                       | <b><i>DLG2</i></b>                                                                                                                                                                                                        |
|                         |             | chr12:15349441-15474823                              | 18.43-18.57                       | chr12:15370878                                       | <b><i>RERG</i></b>                                                                                                                                                                                                        |
| 150                     | 19.43       | chr3:13642870-13647142                               | 19.40-19.41                       | chr3:13647142                                        | <b><i>FBLN2</i></b>                                                                                                                                                                                                       |
|                         |             | chr3:195746771-196315284                             | 18.92-19.31                       | chr3:195768185                                       | <i>TFRC</i> , <i>LINC00885</i> , <i>ZDHC19</i> , <i>SLC51A</i> , <i>PCYT1A</i> , <i>TCTEX1D2</i> , <i>TM4SF19</i> , <i>AK124973</i> , <i>UBXN7</i> , <i>RNF168</i> , <i>C3orf43</i> , <i>WDR53</i> , <i>FBX045</i>        |
|                         |             | chr6:168393286-169110089                             | 13.73-19.28                       | chr6:168835886,<br>chr6:168835089                    | <i>HGC6.1.1</i> , <i>KIF25</i> , <i>FRMD1</i> , <b><i>DACT2</i></b> , <b><i>SMOC2</i></b>                                                                                                                                 |
|                         |             | chr9:74682622-76421057                               | 13.46-19.31                       | chr9:75150031,<br>chr9:75172870                      | <i>C9orf57</i> , <i>GDA</i> , <i>AK095210</i> , <i>ZFAND5</i> , <i>TMC1</i> , <b><i>ALDH1A1</i></b> , <b><i>ANXA1</i></b>                                                                                                 |
|                         |             | chr11:84175049-85657901                              | 16.69-19.29                       | chr11:84765871                                       | <b><i>DLG2</i></b> , <i>TMEM126B</i> , <i>TMEM126A</i> , <i>CREBZF</i> , <i>CCDC89</i> , <i>SYTL2</i> , <i>CCDC83</i>                                                                                                     |
|                         |             | chr12:15314332-15564674                              | 18.66-19.40                       | chr12:15370878                                       | <b><i>RERG</i></b> , <i>PTPRO</i>                                                                                                                                                                                         |
|                         |             | chr16:23036048-23324026                              | 18.27-19.01                       | chr16:23050015,<br>chr16:23050120,<br>chr16:23050867 | <b><i>USP31</i></b> , <i>SCNN1G</i> , <i>SCNN1B</i>                                                                                                                                                                       |
| chr17:15206970-15308844 | 17.81-18.94 | chr17:15248095,<br>chr17:15248353,<br>chr17:15248399 | <b><i>TEKT3</i></b>               |                                                      |                                                                                                                                                                                                                           |

**b**

| Generations | Mean+3sd(%) | Position               | Proportion of Papuan ancestry (%) | MAX_position  | Representative Genes      |
|-------------|-------------|------------------------|-----------------------------------|---------------|---------------------------|
| 50          | 86.83       | chr6:31058340-33954567 | 86.84-93.03                       | chr6:32430975 | <i>HLA class II genes</i> |
| 77          | 85.35       | chr6:32233886-33976742 | 85.47-88.11                       | chr6:32430975 | <i>HLA class II genes</i> |
| 100         | 84.77       | chr6:31920687-33807091 | 84.82-90.17                       | chr6:32430975 | <i>HLA class II genes</i> |
| 150         | 83.09       | chr6:32341367-33831672 | 83.10-87.325                      | chr6:32430975 | <i>HLA class II genes</i> |

Figure S5. Genomic regions showing the proportion of Papuan-related ancestry 3 SD away from the mean.

Genomic regions where the proportion of Papuan-related ancestry was lower than mean - 3 SD (a) and higher than mean + 3 SD (b) when setting the generations since the admixture as 50, 77, 100 or 150. The column “MAX\_position” or “MIN\_position” indicates the positions with the highest or lowest Papuan-related ancestry within each region. The symbols of the genes located in each region were listed in the column “Genes”. Gene names written in bold in (a) were the genes adjacent to MIN position. The gray rows in (a) contain the position of the lowest Papuan-related ancestry across genome.

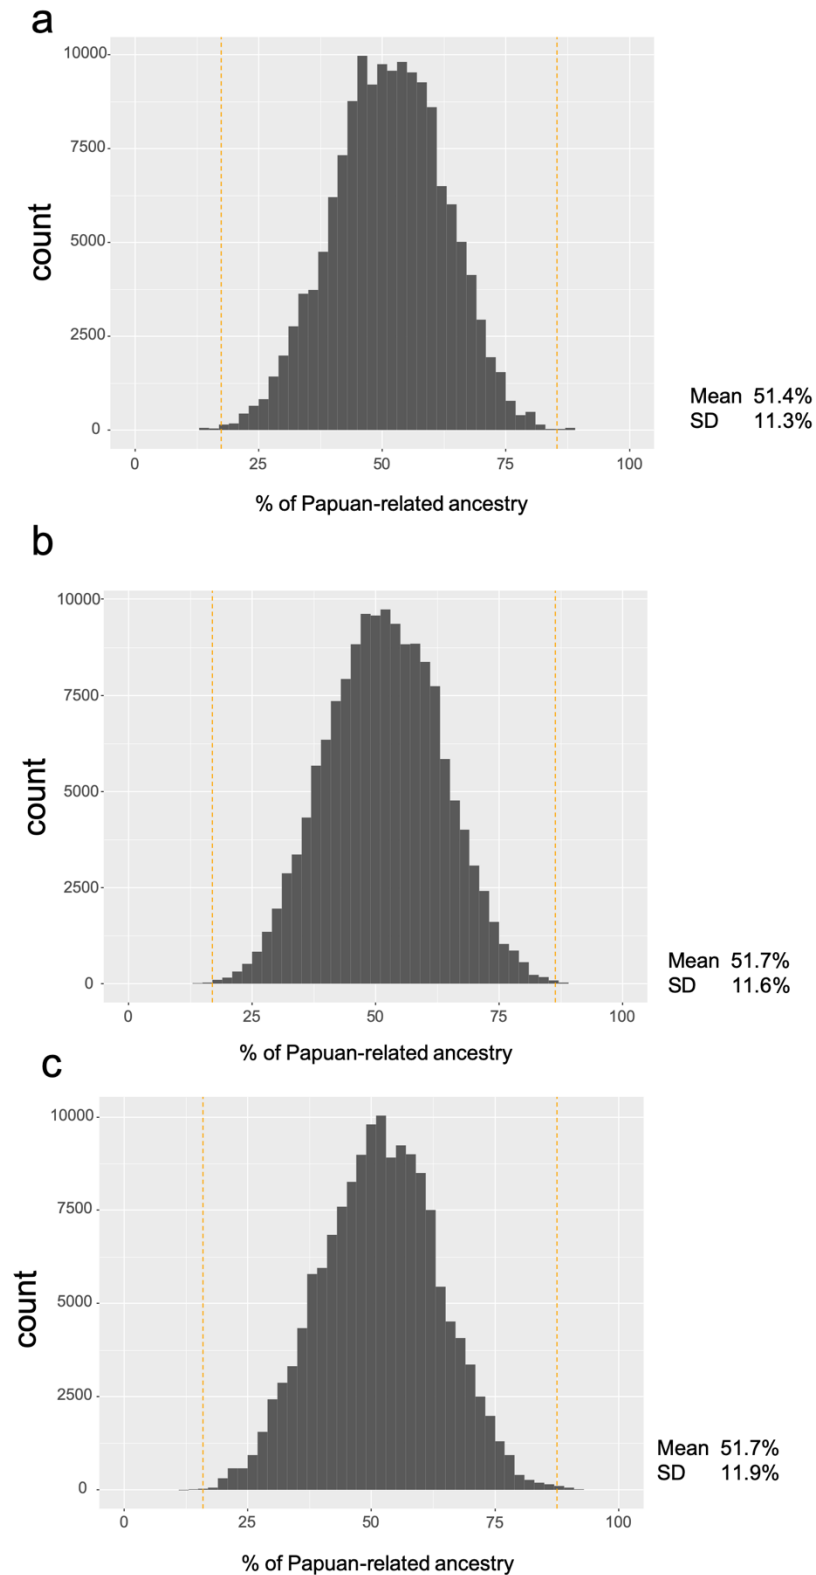

Figure S6. Histogram of the mean (%) of Papuan-related ancestry for each position of every chromosome estimated using genotype data of Munda (a) and simulated data assuming a global recombination rate (i.e.  $1.3 \times 10^{-8}$ /base/ generations) and (b) a recombination rate of the *HLA* region (i.e.  $8.5 \times 10^{-9}$ /base/ generations) (c).

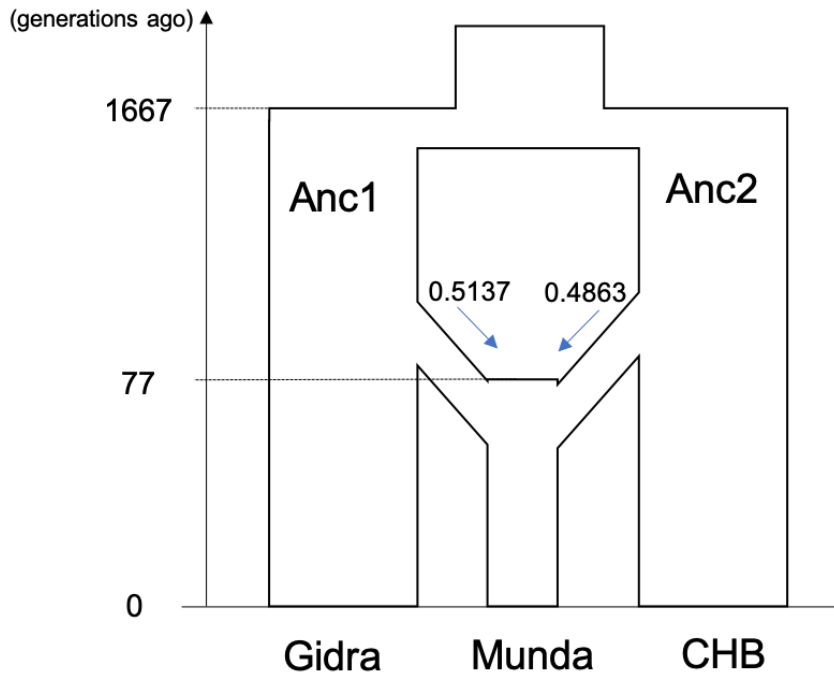

Figure S7. Demographic model reconstructed in coalescent-based simulations. This model assumed that ancestral populations of Munda (CHB and Gidra as Asian- and Papuan-related ancestors) diverged 1667 generations ago (approximately 50,000 years ago) and admixed 77 generations ago (approximately 2,300 years ago). The admixture rates were 0.5137 for Papuan-related ancestry and 0.4863 for Asian-related ancestry. The size of all populations was set as 1,000.



## Supplementary Table

Supplementary Table 1 populations used in this study

| Population         | Region                  | N  | Ref                                                               |
|--------------------|-------------------------|----|-------------------------------------------------------------------|
| Ami                | Taiwan                  | 19 | Lazaridis et al. 2014; Qin and Stoneking 2015; Pugach et al. 2018 |
| Atayal             | Taiwan                  | 16 | Lazaridis et al. 2014; Qin and Stoneking 2015; Pugach et al. 2018 |
| Tonga              | Polynesia               | 24 | Kimura et al. 2008                                                |
| Tonga_MS*          | Polynesia               | 7  | Qin and Stoneking 2015; Pugach et al. 2018                        |
| Ontong_Java        | Polynesian outliers     | 7  | Qin and Stoneking 2015; Pugach et al. 2018                        |
| RenBel*            | Polynesian outliers     | 7  | Qin and Stoneking 2015; Pugach et al. 2018                        |
| Tikopia            | Polynesian outliers     | 6  | Qin and Stoneking 2015; Pugach et al. 2018                        |
| Choiseul           | Western Solomon Islands | 7  | Qin and Stoneking 2015; Pugach et al. 2018                        |
| Isabel             | Western Solomon Islands | 8  | Qin and Stoneking 2015; Pugach et al. 2018                        |
| Kolombangara       | Western Solomon Islands | 5  | Qin and Stoneking 2015; Pugach et al. 2018                        |
| Munda              | Western Solomon Islands | 21 | This study                                                        |
| Ranongga           | Western Solomon Islands | 6  | Qin and Stoneking 2015; Pugach et al. 2018                        |
| Vella_Lavella      | Western Solomon Islands | 6  | Qin and Stoneking 2015; Pugach et al. 2018                        |
| Gela               | Eastern Solomon Islands | 6  | Qin and Stoneking 2015; Pugach et al. 2018                        |
| Makira             | Eastern Solomon Islands | 7  | Qin and Stoneking 2015; Pugach et al. 2018                        |
| Malaita            | Eastern Solomon Islands | 6  | Qin and Stoneking 2015; Pugach et al. 2018                        |
| Russell            | Eastern Solomon Islands | 3  | Qin and Stoneking 2015; Pugach et al. 2018                        |
| Savo               | Eastern Solomon Islands | 7  | Qin and Stoneking 2015; Pugach et al. 2018                        |
| Santa_Cruz         | Eastern Solomon Islands | 7  | Qin and Stoneking 2015; Pugach et al. 2018                        |
| Bougainville_HGDP* | Bougainville Islands    | 10 | Skoglund et al. 2016; Pugach et al. 2018                          |
| Bougainville_South | Bougainville Islands    | 2  | Skoglund et al. 2016; Pugach et al. 2018                          |
| Buka               | Bougainville Islands    | 8  | Skoglund et al. 2016; Pugach et al. 2018                          |
| Saposa             | Bougainville Islands    | 9  | Skoglund et al. 2016; Pugach et al. 2018                          |
| Teop               | Bougainville Islands    | 10 | Skoglund et al. 2016; Pugach et al. 2018                          |
| Mussau             | Mussau Island           | 10 | Skoglund et al. 2016; Pugach et al. 2018                          |
| Manus              | Manus island            | 2  | Skoglund et al. 2016; Pugach et al. 2018                          |
| Kuot_Kabil         | New Ireland             | 9  | Skoglund et al. 2016; Pugach et al. 2018                          |
| Kuot_Lamalaua      | New Ireland             | 4  | Skoglund et al. 2016; Pugach et al. 2018                          |
| Madak              | New Ireland             | 9  | Skoglund et al. 2016; Pugach et al. 2018                          |
| Nailik             | New Ireland             | 9  | Skoglund et al. 2016; Pugach et al. 2018                          |

|                          |             |    |                                            |
|--------------------------|-------------|----|--------------------------------------------|
| Notsi                    | New Ireland | 9  | Skoglund et al. 2016; Pugach et al. 2018   |
| Tigak                    | New Ireland | 10 | Skoglund et al. 2016; Pugach et al. 2018   |
| Ata                      | New Britain | 8  | Skoglund et al. 2016; Pugach et al. 2018   |
| Baining_Malasait         | New Britain | 5  | Skoglund et al. 2016; Pugach et al. 2018   |
| Baining_Marabu           | New Britain | 10 | Skoglund et al. 2016; Pugach et al. 2018   |
| Kol_New_Britain          | New Britain | 2  | Skoglund et al. 2016; Pugach et al. 2018   |
| Kove                     | New Britain | 18 | Skoglund et al. 2016; Pugach et al. 2018   |
| Lavongai                 | New Britain | 15 | Skoglund et al. 2016; Pugach et al. 2018   |
| Mamusi                   | New Britain | 20 | Skoglund et al. 2016; Pugach et al. 2018   |
| Mamusi_Paleabu           | New Britain | 6  | Skoglund et al. 2016; Pugach et al. 2018   |
| Mangseng                 | New Britain | 6  | Skoglund et al. 2016; Pugach et al. 2018   |
| Melamela                 | New Britain | 10 | Skoglund et al. 2016; Pugach et al. 2018   |
| Mengen                   | New Britain | 10 | Skoglund et al. 2016; Pugach et al. 2018   |
| Nakanai_Bileki           | New Britain | 10 | Skoglund et al. 2016; Pugach et al. 2018   |
| Nakanai_Loso             | New Britain | 7  | Skoglund et al. 2016; Pugach et al. 2018   |
| Sulka                    | New Britain | 18 | Skoglund et al. 2016; Pugach et al. 2018   |
| Tolai                    | New Britain | 20 | Skoglund et al. 2016; Pugach et al. 2018   |
| Gidra                    | New Guinea  | 24 | Kimura et al. 2008                         |
| New_Guinea*              | New Guinea  | 19 | Qin and Stoneking 2015; Pugach et al. 2018 |
| New_Guinea_HGDP*         | New Guinea  | 16 | Lazaridis et al. 2014; Pugach et al. 2018  |
| Papuan_Central_Province  | New Guinea  | 5  | Qin and Stoneking 2015; Pugach et al. 2018 |
| Papuan_Eastern_Highlands | New Guinea  | 4  | Qin and Stoneking 2015; Pugach et al. 2018 |
| Papuan_Gulf_Province     | New Guinea  | 3  | Qin and Stoneking 2015; Pugach et al. 2018 |

---

\*Buogainville HGDP, New\_Guinea\_HGDP and Tonga\_MS are the same populations with Nasioi, Papuan and Tongan in Pugach et al. (2018), respectively. New\_Guinea is comprised of Papuan\_Eastern\_Highlands, Papuan\_Huli and Papuan\_Mendi\_Kewa in Pugach et al. (2018).

+Renbel is a combined sample from the islands of Renell and Bellona nature
